# Supplementary material for: Dissipation, Residue and Human Dietary Risk Assessment of Pyraclostrobin and Cyazofamid in Grapes Using an HPLC-UV Detector
Source: MDPI journal article supplement (doi:10.3390/foods13020314), 2024-01-18
Supplement: s1 [file s1]

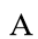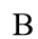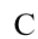

**Figure S1.** Structures of pyraclostrobin, cyazofamid and CCIM: (A) pyraclostrobin, (B) cyazofamid, (C) CCIM.

**Table S1.** Gradient elution conditions.

| t/min | Flow rate<br>(mL/min) | Acetonitrile<br>(%) | 0.1% Formic acid-water (%) |
|-------|-----------------------|---------------------|----------------------------|
| 0     | 1                     | 65                  | 35                         |
| 20    | 1                     | 65                  | 35                         |

**Table S2.** Recoveries of pyraclostrobin and cyazofamid and CCIM in grapes  
( $n = 5$ ).

| Compound       | Spiked<br>level<br>(mg/kg) | Spike<br>solvent |         | Spike<br>matrix |         |
|----------------|----------------------------|------------------|---------|-----------------|---------|
|                |                            | average          | RSD (%) | average         | RSD (%) |
|                |                            | recoveries       |         | recoveries      |         |
|                |                            | (%)              |         | (%)             |         |
| Pyraclostrobin | 0.05                       | 93               | 20.3    | 98              | 19.8    |
|                | 0.50                       | 84               | 9.46    | 99              | 2.4     |
|                | 2.0                        | 94               | 6.0     | 99              | 6.9     |
| Cyazofamid     | 0.05                       | 92               | 10.5    | 97              | 8.1     |
|                | 0.50                       | 96               | 2.4     | 84              | 3.2     |
|                | 1.0                        | 98               | 8.2     | 100             | 1.9     |
| CCIM           | 0.05                       | 104              | 1.3     | 102             | 1.1     |
|                | 0.50                       | 100              | 4.0     | 99              | 1.3     |
|                | 1.0                        | 99               | 3.2     | 96              | 0.5     |

**Table S3.** Probability model calculation for acute dietary risk of pyraclostrobin and cyazofamid in grape.

| pesticide      | category                     | P50     | P90     | P95      | P99      | P99.9    |
|----------------|------------------------------|---------|---------|----------|----------|----------|
| pyraclostrobin | general population           | 8.100%  | 30.904% | 49.706%  | 78.505%  | 139.332% |
|                | children                     | 17.177% | 65.539% | 105.415% | 166.490% | 295.489% |
|                | Women of<br>childbearing age | 4.272%  | 16.298% | 26.214%  | 41.402%  | 73.481%  |
| cyazofamid     | general population           | 0.852%  | 1.244%  | 1.415%   | 1.600%   | 1.872%   |
|                | children                     | 1.808%  | 2.637%  | 3.001%   | 3.393%   | 3.970%   |
|                | Women of<br>childbearing age | 0.450%  | 0.656%  | 0.746%   | 0.844%   | 0.987%   |

**Table S4.** Chronic dietary risk assessment of pyraclostrobin in grape.

| Pyraclostrobin |       | Deterministic model |        |        |        |         | Probabilistic model |          |        |        |        |         |          |
|----------------|-------|---------------------|--------|--------|--------|---------|---------------------|----------|--------|--------|--------|---------|----------|
|                |       | urban               | rural  | urban  |        |         |                     |          | rural  |        |        |         |          |
| Gender         | Age   | mean                | mean   | P50    | P90    | P95     | P99                 | P99.9    | P50    | P90    | P95    | P99     | P99.9    |
| male           | 2-3   | 5.122%              | 3.729% | 1.655% | 6.314% | 10.156% | 28.467%             | 189.617% | 1.205% | 4.596% | 7.393% | 20.723% | 138.032% |
|                | 4-6   | 3.445%              | 3.310% | 1.113% | 4.247% | 6.831%  | 19.149%             | 127.549% | 1.070% | 4.081% | 6.564% | 18.398% | 122.549% |
|                | 7-10  | 2.716%              | 2.218% | 0.878% | 3.349% | 5.386%  | 15.097%             | 100.561% | 0.717% | 2.735% | 4.398% | 12.329% | 82.123%  |
|                | 11-13 | 1.892%              | 1.572% | 0.611% | 2.332% | 3.751%  | 10.515%             | 70.038%  | 0.508% | 1.938% | 3.117% | 8.737%  | 58.197%  |
|                | 14-17 | 1.734%              | 0.999% | 0.560% | 2.138% | 3.438%  | 9.638%              | 64.195%  | 0.323% | 1.232% | 1.981% | 5.553%  | 36.985%  |
|                | 18-29 | 1.026%              | 0.838% | 0.331% | 1.264% | 2.034%  | 5.700%              | 37.969%  | 0.271% | 1.033% | 1.662% | 4.659%  | 31.031%  |
|                | 30-44 | 0.926%              | 0.634% | 0.299% | 1.142% | 1.836%  | 5.147%              | 34.287%  | 0.205% | 0.781% | 1.256% | 3.522%  | 23.459%  |
|                | 45-59 | 0.989%              | 0.530% | 0.319% | 1.219% | 1.961%  | 5.496%              | 36.609%  | 0.171% | 0.654% | 1.051% | 2.947%  | 19.630%  |
|                | 60-69 | 1.149%              | 0.538% | 0.371% | 1.416% | 2.278%  | 6.385%              | 42.531%  | 0.174% | 0.663% | 1.067% | 2.991%  | 19.925%  |
|                | ≥70   | 1.286%              | 0.348% | 0.415% | 1.585% | 2.549%  | 7.146%              | 47.601%  | 0.112% | 0.429% | 0.690% | 1.933%  | 12.877%  |
| female         | 2-3   | 4.027%              | 4.484% | 1.301% | 4.964% | 7.985%  | 22.382%             | 149.087% | 1.449% | 5.528% | 8.891% | 24.923% | 166.013% |
|                | 4-6   | 4.170%              | 3.644% | 1.347% | 5.141% | 8.268%  | 23.177%             | 154.379% | 1.177% | 4.492% | 7.226% | 20.254% | 134.909% |
|                | 7-10  | 3.121%              | 2.186% | 1.008% | 3.848% | 6.189%  | 17.348%             | 115.551% | 0.706% | 2.694% | 4.334% | 12.148% | 80.917%  |

|       |        |        |        |        |        |         |         |        |        |        |        |         |
|-------|--------|--------|--------|--------|--------|---------|---------|--------|--------|--------|--------|---------|
| 11-13 | 1.963% | 1.468% | 0.634% | 2.420% | 3.893% | 10.911% | 72.679% | 0.474% | 1.809% | 2.910% | 8.156% | 54.328% |
| 14-17 | 2.254% | 1.247% | 0.728% | 2.778% | 4.469% | 12.526% | 83.437% | 0.403% | 1.537% | 2.472% | 6.929% | 46.154% |
| 18-29 | 1.794% | 1.080% | 0.580% | 2.211% | 3.557% | 9.970%  | 66.411% | 0.349% | 1.331% | 2.141% | 6.001% | 39.973% |
| 30-44 | 1.562% | 0.828% | 0.505% | 1.925% | 3.096% | 8.679%  | 57.808% | 0.268% | 1.021% | 1.642% | 4.604% | 30.665% |
| 45-59 | 1.348% | 0.647% | 0.436% | 1.662% | 2.673% | 7.493%  | 49.913% | 0.209% | 0.798% | 1.283% | 3.598% | 23.964% |
| 60-69 | 1.416% | 0.577% | 0.457% | 1.745% | 2.807% | 7.870%  | 52.419% | 0.187% | 0.712% | 1.145% | 3.210% | 21.379% |
| ≥70   | 1.176% | 0.352% | 0.380% | 1.449% | 2.331% | 6.535%  | 43.530% | 0.114% | 0.434% | 0.698% | 1.955% | 13.023% |

---

**Table S5.** Chronic dietary risk assessment of cyazofamid in grape.

| Cyazofamid |       | Deterministic model |        |        | Probabilistic model |        |        |        |        |        |        |        |        |
|------------|-------|---------------------|--------|--------|---------------------|--------|--------|--------|--------|--------|--------|--------|--------|
|            |       | urban               | rural  | urban  |                     |        |        |        | rural  |        |        |        |        |
| Gende<br>r | Age   | mean                | mean   | P50    | P90                 | P95    | P99    | P99.9  | P50    | P90    | P95    | P99    | P99.9  |
| male       | 2-3   | 4.334%              | 3.155% | 0.307% | 0.553%              | 0.666% | 0.967% | 1.714% | 0.224% | 0.402% | 0.485% | 0.704% | 1.248% |
|            | 4-6   | 2.915%              | 2.801% | 0.207% | 0.372%              | 0.448% | 0.650% | 1.153% | 0.198% | 0.357% | 0.430% | 0.625% | 1.108% |
|            | 7-10  | 2.299%              | 1.877% | 0.163% | 0.293%              | 0.353% | 0.513% | 0.909% | 0.133% | 0.239% | 0.288% | 0.419% | 0.742% |
|            | 11-13 | 1.601%              | 1.330% | 0.113% | 0.204%              | 0.246% | 0.357% | 0.633% | 0.094% | 0.170% | 0.204% | 0.297% | 0.526% |
|            | 14-17 | 1.467%              | 0.845% | 0.104% | 0.187%              | 0.225% | 0.327% | 0.580% | 0.060% | 0.108% | 0.130% | 0.189% | 0.334% |
|            | 18-29 | 0.868%              | 0.709% | 0.061% | 0.111%              | 0.133% | 0.194% | 0.343% | 0.050% | 0.090% | 0.109% | 0.158% | 0.281% |
|            | 30-44 | 0.784%              | 0.536% | 0.056% | 0.100%              | 0.120% | 0.175% | 0.310% | 0.038% | 0.068% | 0.082% | 0.120% | 0.212% |
|            | 45-59 | 0.837%              | 0.449% | 0.059% | 0.107%              | 0.129% | 0.187% | 0.331% | 0.032% | 0.057% | 0.069% | 0.100% | 0.177% |
|            | 60-69 | 0.972%              | 0.455% | 0.069% | 0.124%              | 0.149% | 0.217% | 0.384% | 0.032% | 0.058% | 0.070% | 0.102% | 0.180% |
|            | ≥70   | 1.088%              | 0.294% | 0.077% | 0.139%              | 0.167% | 0.243% | 0.430% | 0.021% | 0.038% | 0.045% | 0.066% | 0.116% |
| female     | 2-3   | 3.408%              | 3.795% | 0.241% | 0.434%              | 0.524% | 0.760% | 1.348% | 0.269% | 0.484% | 0.583% | 0.846% | 1.501% |
|            | 4-6   | 3.529%              | 3.084% | 0.250% | 0.450%              | 0.542% | 0.787% | 1.396% | 0.218% | 0.393% | 0.474% | 0.688% | 1.220% |
|            | 7-10  | 2.641%              | 1.850% | 0.187% | 0.337%              | 0.406% | 0.589% | 1.045% | 0.131% | 0.236% | 0.284% | 0.412% | 0.732% |

|       |        |        |        |        |        |        |        |        |        |        |        |        |
|-------|--------|--------|--------|--------|--------|--------|--------|--------|--------|--------|--------|--------|
| 11-13 | 1.661% | 1.242% | 0.118% | 0.212% | 0.255% | 0.370% | 0.657% | 0.088% | 0.158% | 0.191% | 0.277% | 0.491% |
| 14-17 | 1.907% | 1.055% | 0.135% | 0.243% | 0.293% | 0.425% | 0.754% | 0.075% | 0.135% | 0.162% | 0.235% | 0.417% |
| 18-29 | 1.518% | 0.914% | 0.108% | 0.194% | 0.233% | 0.339% | 0.600% | 0.065% | 0.116% | 0.140% | 0.204% | 0.361% |
| 30-44 | 1.321% | 0.701% | 0.094% | 0.168% | 0.203% | 0.295% | 0.523% | 0.050% | 0.089% | 0.108% | 0.156% | 0.277% |
| 45-59 | 1.141% | 0.548% | 0.081% | 0.145% | 0.175% | 0.254% | 0.451% | 0.039% | 0.070% | 0.084% | 0.122% | 0.217% |
| 60-69 | 1.198% | 0.489% | 0.085% | 0.153% | 0.184% | 0.267% | 0.474% | 0.035% | 0.062% | 0.075% | 0.109% | 0.193% |
| ≥70   | 0.995% | 0.298% | 0.070% | 0.127% | 0.153% | 0.222% | 0.394% | 0.021% | 0.038% | 0.046% | 0.066% | 0.118% |

---
